# Supplementary material for: Lipid Nanoparticles for Enhancing the Physicochemical Stability and Topical Skin Delivery of Orobol
Source: PubMed Central journal article supplement (PMC7560103; doi:10.3390/pharmaceutics12090845), 2020-09-03
Supplement: pharmaceutics-12-00845-s001.pdf [file pharmaceutics-12-00845-s001.pdf]

1 Article

2 **Supplementary Materials: Lipid Nanoparticles for**  
3 **Enhancing the Physicochemical Stability and Topical**  
4 **Skin Delivery of Orobol**

5 Min-Hwan Kim, Yae-Eun Jeon, Soobeen Kang, Jae-Young Lee, Ki Won Lee, Ki-Taek Kim and  
6 Dae-Duk Kim

(a)

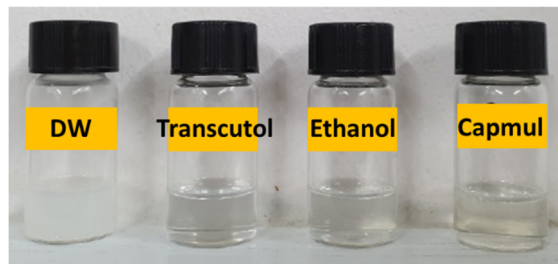

(b)

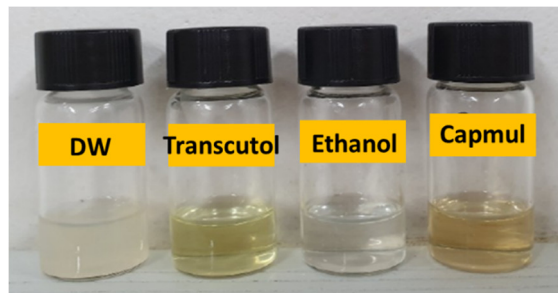

(c)

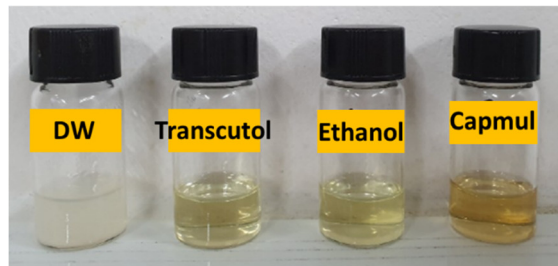

7 **Figure S1.** The color change of orobol (0.05%, *w/w*) in various vehicles. (a) Samples immediately after  
8 the preparation; (b) samples stored at room temperature for 14 days without sunlight exposure; (c)  
9 samples stored at room temperature for 14 days with sunlight exposure.

(a)

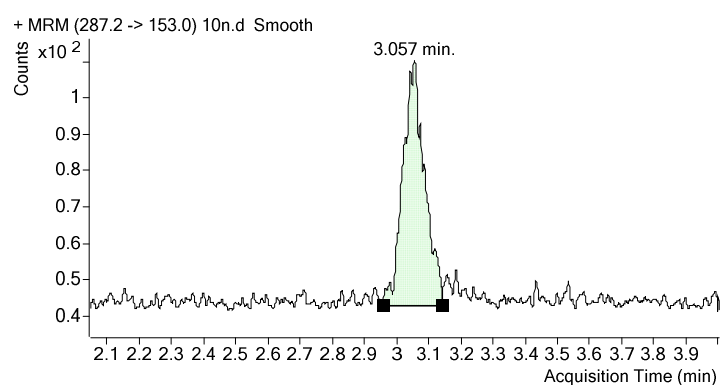

(b)

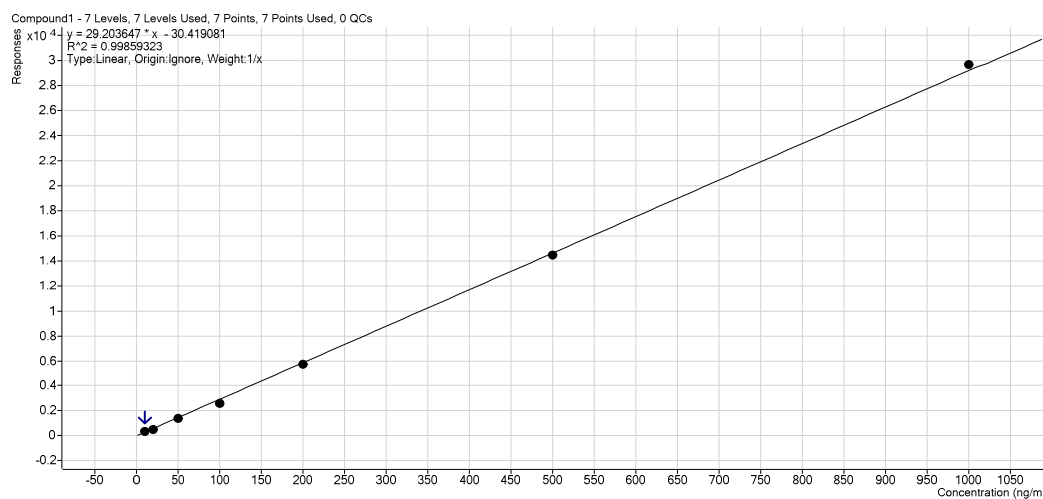

10 **Figure S2.** (a) The LC-MS/MS peak of orobol at a concentration of the lower limit of quantification  
11 (10.0 ng/mL); (b) The calibration curve of orobol at a final concentration range of 10.0 – 1000 ng/mL.

12

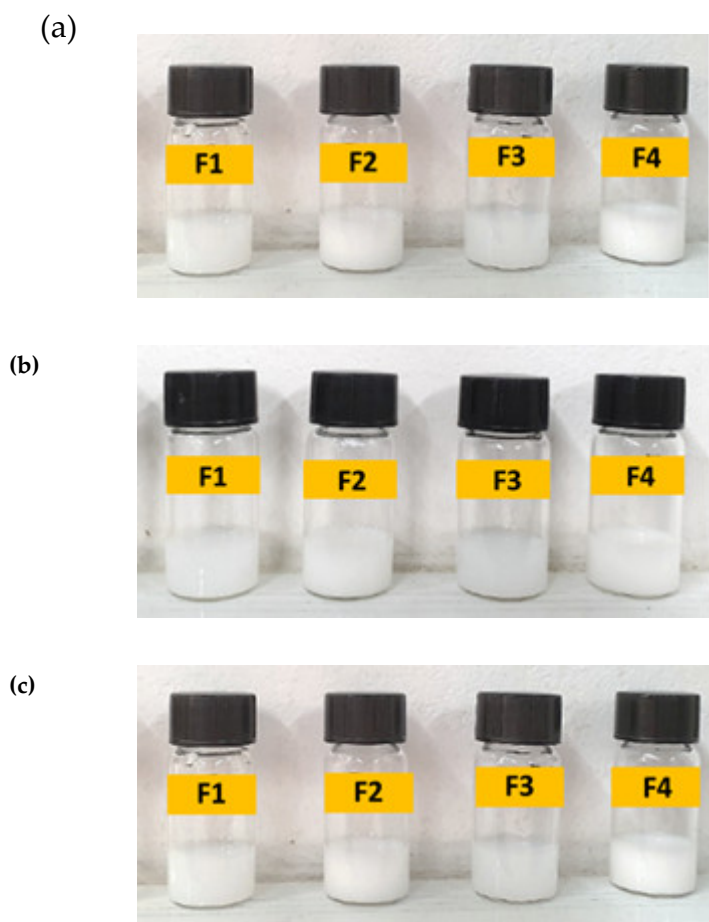

13 **Figure S3.** The color change of the orobol-loaded formulations. (a) Samples immediately after the  
 14 preparation; (b) Samples stored at room temperature for 14 days without exposure to sunlight; (c)  
 15 Samples stored at room temperature for 14 days with exposure to sunlight.

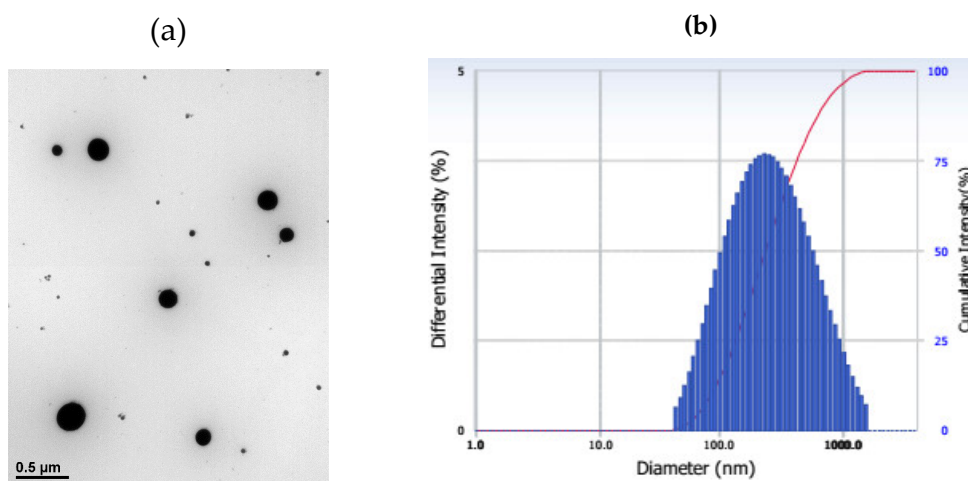

16 **Figure S4.** (a) Morphological shapes of *o/w* ME formulation by TEM and (b) its size distribution. The  
 17 scale bars represent 0.5 μm.

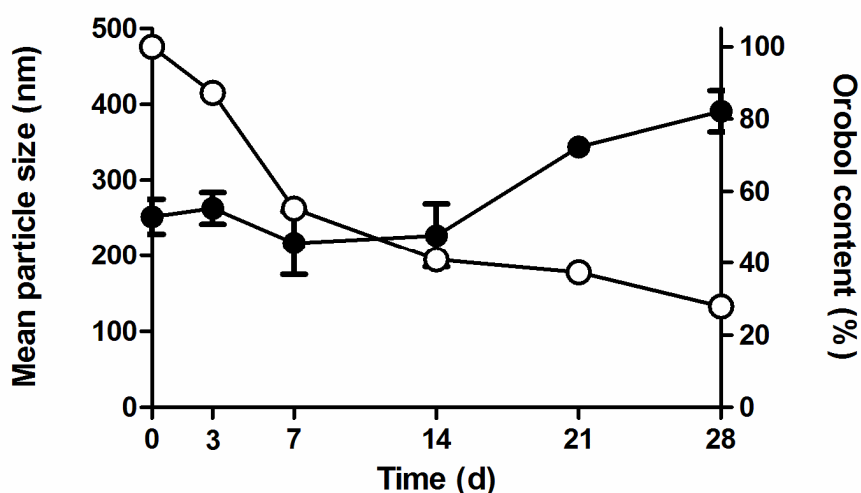

18

19

20

21

**Figure S5.** The change of mean particle size (left Y-axis; ●) and content (% of initial concentration; right Y-axis; ○) in *o/w* ME formulation at room temperature on day 0 (initial state after the preparation), day 3, 7, 14, 21, and 28.

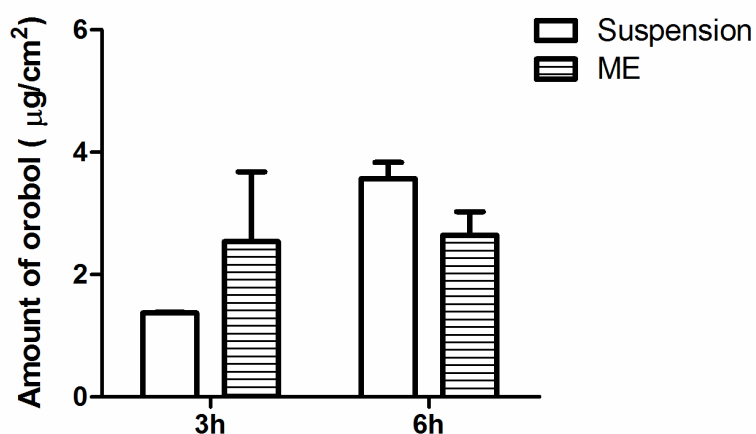

22

23

24

**Figure S6.** In vitro deposition of orobol into a Strat-M membrane after applying orobol-loaded *o/w* ME formulation at the concentration of 0.5 mg/mL for 3 h and 6 h.

25

26

**Table S1.** Criteria of the skin irritation score system by the guideline of the International Contact Dermatitis Research Group (ICDRG) and the Personal Care Products Council (PCPC).

| Score | Criteria for Skin Irritation                              |
|-------|-----------------------------------------------------------|
| 0     | No signs of irritation                                    |
| 0.5   | Doubtful or slight reaction                               |
| 1     | Slight erythema                                           |
| 2     | Moderate erythema with or without partial edema           |
| 3     | Moderate erythema with diffusive edema                    |
| 4     | Intense erythema with diffusive edema containing vesicles |

27

28

29 **Table S2.** The standard procedure dermal classification system by the Environmental Protection  
30 Agency (EPA).

31

| Skin Irritation Index | Classification of Skin Irritation |
|-----------------------|-----------------------------------|
| 0.00–0.02             | No irritancy                      |
| 0.02–0.25             | Low irritancy                     |
| 0.25–1.00             | Slight irritancy                  |
| 1.00–2.50             | Moderate irritancy                |
| >2.50                 | Severe irritancy                  |

32 **Table S3.** Skin irritation scores of the blank nanostructured lipid carrier (NLC) formulation (blank F4)  
33 and the orobol-loaded NLC formulation (F4) at 30 min, 24 h, and 48 h after topical application of the  
34 samples to human volunteers for 24 h.

| Human Subject | Not-Treated |      |      | Blank F4 |      |      | F4     |      |      |
|---------------|-------------|------|------|----------|------|------|--------|------|------|
|               | 30 min      | 24 h | 48 h | 30 min   | 24 h | 48 h | 30 min | 24 h | 48 h |
| No. 1         | 0           | 0    | 0    | 0        | 0    | 0    | 0      | 0    | 0    |
| No. 2         | 0           | 0    | 0    | 0        | 0    | 0    | 0      | 0    | 0    |
| No. 3         | 0           | 0    | 0    | 0        | 0    | 0    | 0      | 0    | 0    |
| No. 4         | 0           | 0    | 0    | 0        | 0    | 0    | 0      | 0    | 0    |
| No. 5         | 0           | 0    | 0    | 0        | 0    | 0    | 0      | 0    | 0    |
| No. 6         | 0           | 0    | 0    | 0        | 0    | 0    | 0      | 0    | 0    |
| No. 7         | 0           | 0    | 0    | 0        | 0    | 0    | 0      | 0    | 0    |
| No. 8         | 0           | 0    | 0    | 0        | 0    | 0    | 0      | 0    | 0    |
| No. 9         | 0           | 0    | 0    | 0        | 0    | 0    | 0      | 0    | 0    |
| No. 10        | 0           | 0    | 0    | 0        | 0    | 0    | 0      | 0    | 0    |
| No. 11        | 0           | 0    | 0    | 0        | 0    | 0    | 0      | 0    | 0    |
| No. 12        | 0           | 0    | 0    | 0        | 0    | 0    | 0      | 0    | 0    |
| No. 13        | 0           | 0    | 0    | 0        | 0    | 0    | 0      | 0    | 0    |
| No. 14        | 0           | 0    | 0    | 0.5      | 0.5  | 0.5  | 0.5    | 0.5  | 0.5  |
| No. 15        | 0           | 0    | 0    | 0        | 0    | 0    | 0      | 0    | 0    |
| No. 16        | 0           | 0    | 0    | 0        | 0    | 0    | 0      | 0    | 0    |
| No. 17        | 0           | 0    | 0    | 0        | 0    | 0    | 0      | 0    | 0    |
| No. 18        | 0           | 0    | 0    | 0        | 0    | 0    | 0      | 0    | 0    |
| No. 19        | 0           | 0    | 0    | 0        | 0    | 0    | 0      | 0    | 0    |
| No. 20        | 0           | 0    | 0    | 0        | 0    | 0    | 0      | 0    | 0    |
| No. 21        | 0           | 0    | 0    | 0        | 0    | 0    | 0      | 0    | 0    |
| No. 22        | 0           | 0    | 0    | 0        | 0    | 0    | 0      | 0    | 0    |
| No. 23        | 0           | 0    | 0    | 0        | 0    | 0    | 0      | 0    | 0    |
| No. 24        | 0           | 0    | 0    | 0        | 0    | 0    | 0      | 0    | 0    |
| No. 25        | 0           | 0    | 0    | 0        | 0    | 0    | 0      | 0    | 0    |
| No. 26        | 0           | 0    | 0    | 0        | 0    | 0    | 0      | 0    | 0    |
| No. 27        | 0           | 0    | 0    | 0        | 0    | 0    | 0      | 0    | 0    |
| No. 28        | 0           | 0    | 0    | 0        | 0    | 0    | 0      | 0    | 0    |
| No. 29        | 0           | 0    | 0    | 0        | 0    | 0    | 0      | 0    | 0    |
| No. 30        | 0           | 0    | 0    | 0        | 0    | 0    | 0      | 0    | 0    |

35 **Table S4.** Composition of o/w ME formulation (w/w %) containing 0.05(w/w %) of orobol.

| Phase      | Vehicle       | ME Formulation |
|------------|---------------|----------------|
| Oil        | Capmul MCM EP | 20             |
| Surfactant | Transcutol    | 28.7           |
|            | Labrasol      | 14.3           |
| Water      | DW            | 36.95          |

36
